# Supplementary material for: Facile synthesis of mesoporous FeNi-alloyed carbonaceous microspheres as recyclable magnetic adsorbents for trichloroethylene removal
Source: Royal Society of Chemistry journal article supplement (doi:10.1039/c5ra17165b), 2015-01-01
Supplement: c5ra17165b1.pdf [file c5ra17165b1.pdf]

## Supporting Information

### **Facile Synthesis of Mesoporous FeNi-alloyed Carbonaceous Microsphere as Recyclable Magnetic Adsorbent for Trichloroethylene Removal**

Xinxin Liu<sup>a</sup>, Dong Zhang<sup>b</sup>, Biao Guo<sup>a</sup>, Yue Qu<sup>a</sup>, Ge Tian<sup>a</sup>, Huijuan Yue<sup>a\*</sup>, Shouhua Feng<sup>a</sup>

<sup>a</sup> State Key Laboratory of Inorganic Synthesis and Preparative Chemistry, College of Chemistry, Jilin University, Changchun 130012, P. R. China.

<sup>b</sup> Key Laboratory of Physics and Technology for Advanced Batteries (Ministry of Education), College of Physics, Jilin University, Changchun 130012, P. R. China.

Corresponding author: [huijuan@jlu.edu.cn](mailto:huijuan@jlu.edu.cn)

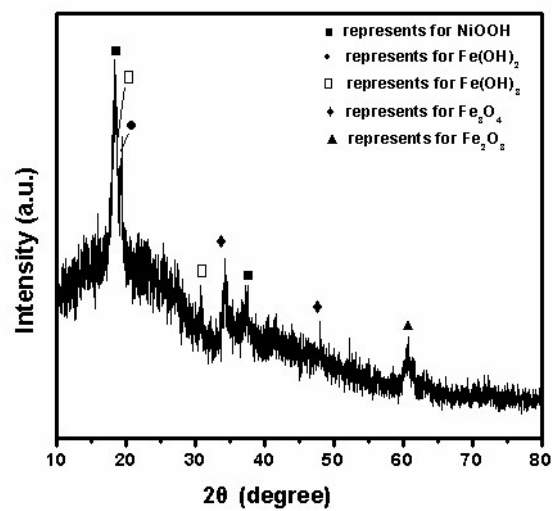

Fig. S1. XRD pattern of heterogeneous precursors of M(OH)<sub>x</sub> and MO<sub>x</sub> formed after hydrothermal treatment.

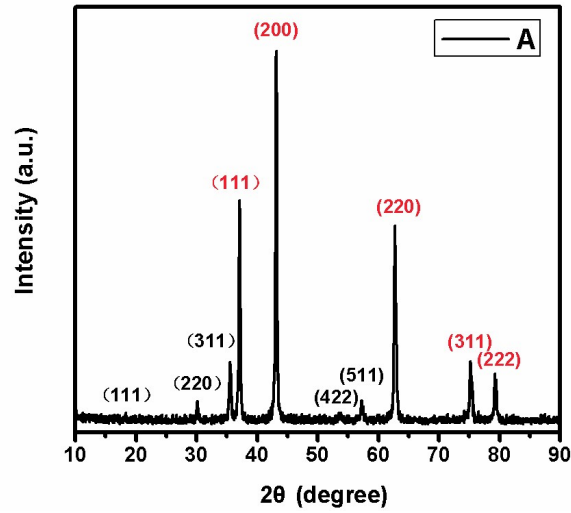

Fig. S2. XRD pattern of FeNi/CS calcined at 800°C.

Fig.S2 shows the XRD patterns of FeNi /CS calcined at 800 °C. In the pattern of the sample, the peaks at 37.2, 43.27, 62.88, 75.41 and 79.41 were observed, which were ascribed to the (1 1 1), (2 0 0), (2 2 0), (3 1 1) and (2 2 2) faces of NiO (PDF # 44-1159). Besides, we can also see the peaks appeared at 18.30, 30.1, 35.45, 53.45 and 56.98, which were due to the (1 1 1), (2 2 0), (3 1 1), (4 2 2) and (5 1 1) faces of Fe<sub>3</sub>O<sub>4</sub> (PDF # 65-3107).

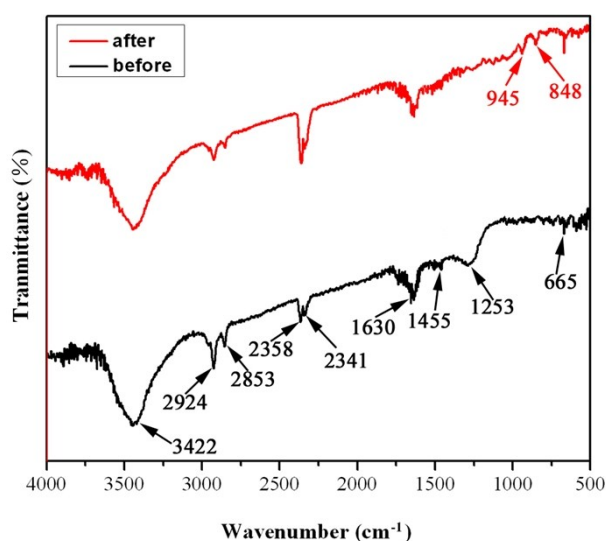

Fig.S3. FT-IR spectra of FeNi/CS-700 before and after adsorption of TCE.

Fig.S3 shows the FTIR spectra of the two samples. The absorption at 3422 was ascribed to the -OH vibrations of the adsorbed H<sub>2</sub>O. The peak at 2853 and 2924cm<sup>-1</sup> were attributed to C-H stretching vibration. The bands observed at 2341 and 2358 cm<sup>-1</sup> were assigned to the CO<sub>2</sub> stretching vibration. Bending vibrations of C-H bonds can be observed at 1455cm<sup>-1</sup>. The peaks at 1063 and 1253 cm<sup>-1</sup> were attributed to the C-O stretching vibration. The band at 1632cm<sup>-1</sup> was corresponding to the stretching vibrations of C=C. Comparing the two spectra, obvious characteristic vibrations of C-Cl in TCE molecules at about 848 and 945 cm<sup>-1</sup> were observed, demonstrating that the adsorption of TCE on the surface of FeNi/CS-700 in the water.
